# Supplementary material for: Ru@N/S/TiO2/rGO: a high performance HER electrocatalyst prepared by dye-sensitization
Source: Royal Society of Chemistry journal article supplement (doi:10.1039/d1dt03072h), 2021-01-01
Supplement: d1dt03072h1.pdf [file d1dt03072h1.pdf]

*Supporting information*

**Ru@N/S/TiO<sub>2</sub>/rGO: A High Performance HER  
Electrocatalyst Prepared by Dye-Sensitization**

Hai-Lang Jia<sup>\*a</sup>, Jiao Zhao,<sup>a</sup> Zhiyuan Wang,<sup>b</sup> Rui-Xin Chen,<sup>a</sup> Ming-Yun Guan<sup>a</sup>

<sup>a</sup>School of Chemical and Environmental Engineering, Institute of Advanced Functional Materials  
for Energy, Jiangsu University of Technology, Changzhou 213001, P. R. China.

<sup>b</sup>PLA Army Academy of Artillery and Air Defense, Hefei, 230031, P. R. China.

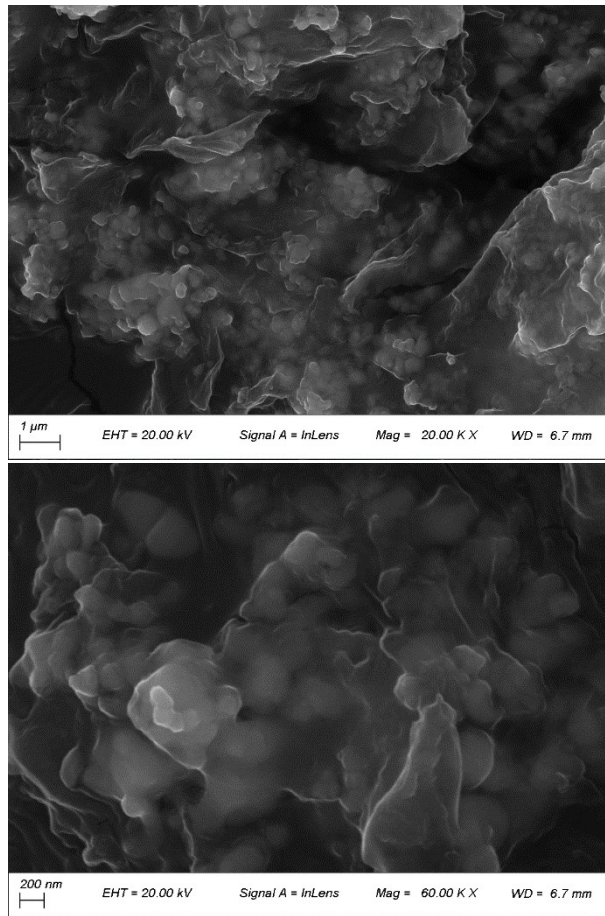

**Fig. S1** SEM of Ru@N/S/TiO<sub>2</sub>/rGO

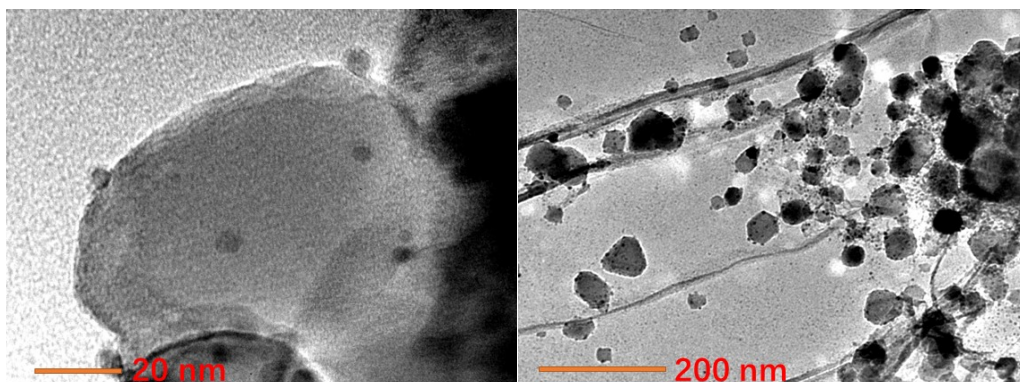

**Fig. S2** TEM of Ru@N/S/TiO<sub>2</sub>/rGO

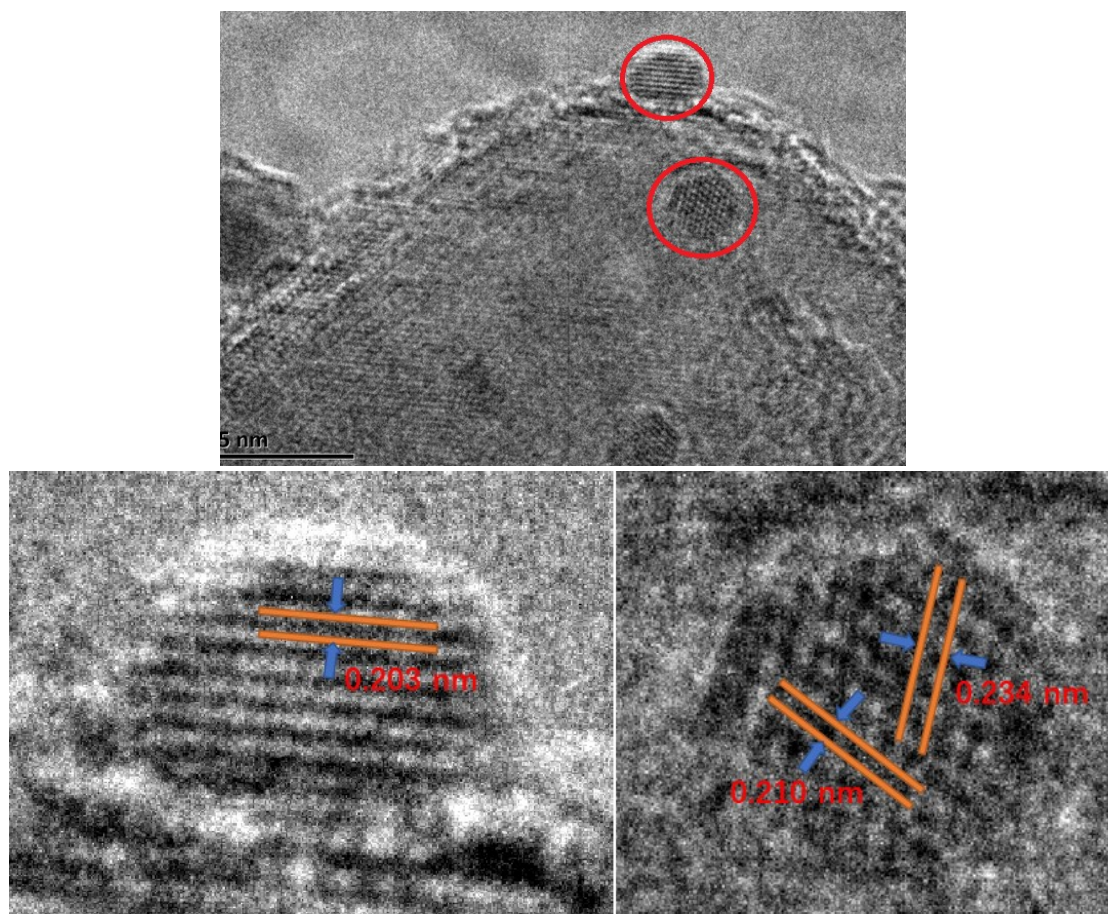

Fig. S3 HR-TEM of Ru@N/S/TiO<sub>2</sub>/rGO

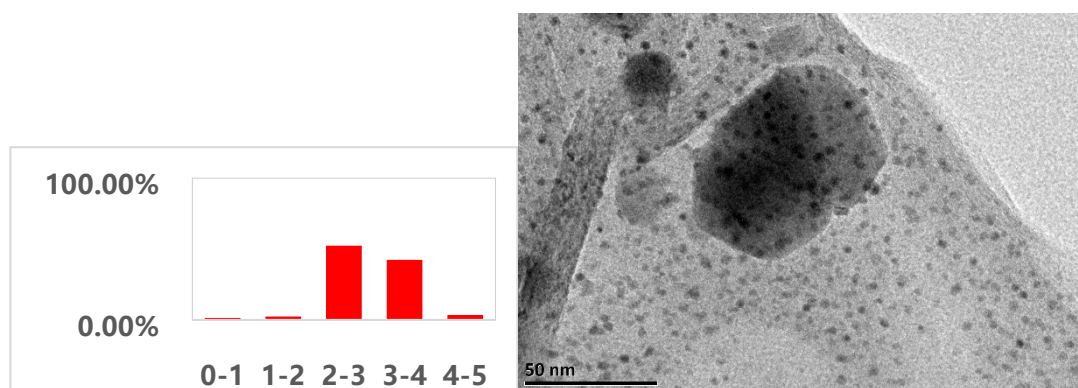

Fig. S4 Particle size distribution of Ru@N/S/TiO<sub>2</sub>/rGO

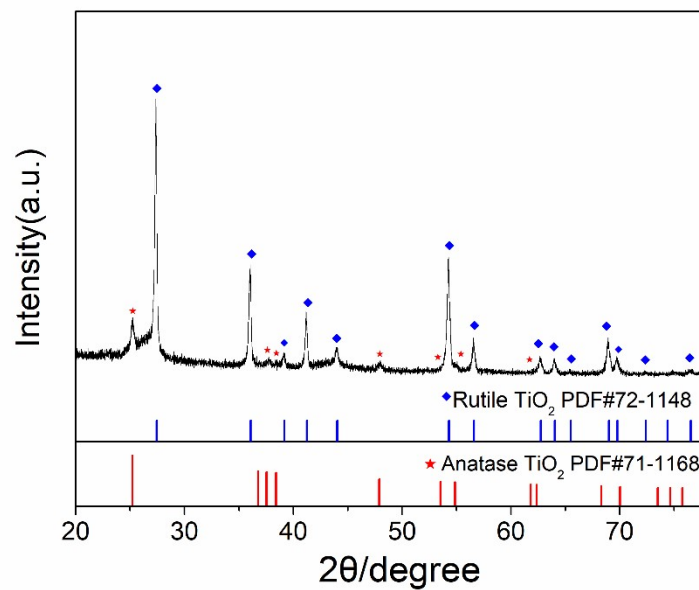

**Fig. S5** XRD of Ru@N/S/TiO<sub>2</sub>/rGO

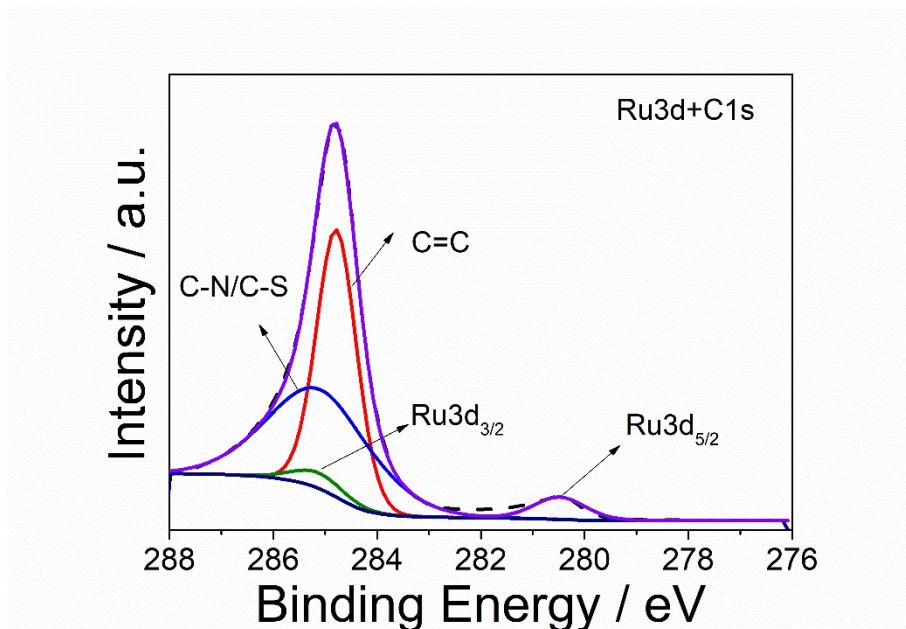

**Fig. S6** High-resolution XPS spectra of Ru3d of Ru@N/S/TiO<sub>2</sub>/rGO

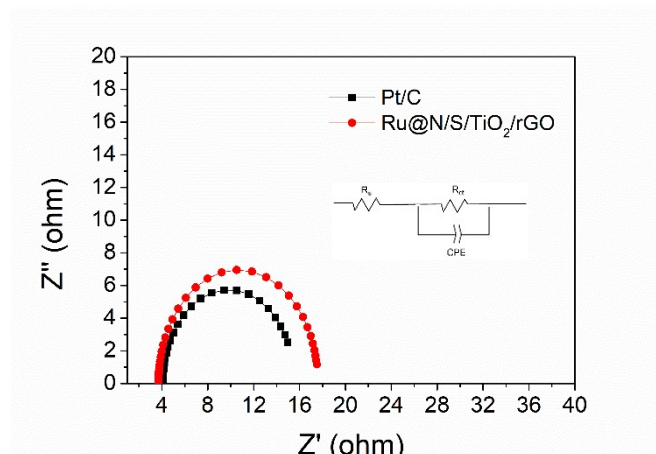

**Fig. S7** EIS of Ru@N/S/TiO<sub>2</sub>/rGO and Pt/C in 0.5 M H<sub>2</sub>SO<sub>4</sub>.

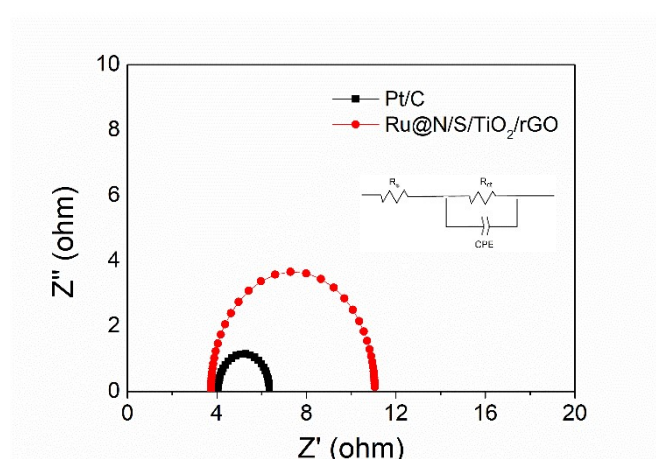

**Fig. S8** EIS of Ru@N/S/TiO<sub>2</sub>/rGO and Pt/C in 1 M KOH.

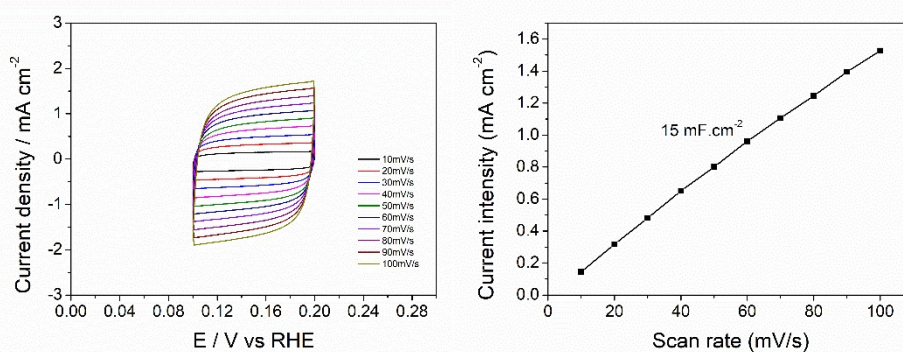

**Fig. S9** CV curves of Ru@N/S/TiO<sub>2</sub>/rGO at various scan rates in 0.5 M H<sub>2</sub>SO<sub>4</sub>, charging current density differences plotted against scan rates. The linear slope, equivalent to twice the double-layer capacitance, C<sub>dl</sub> was used to represent the rECSA.

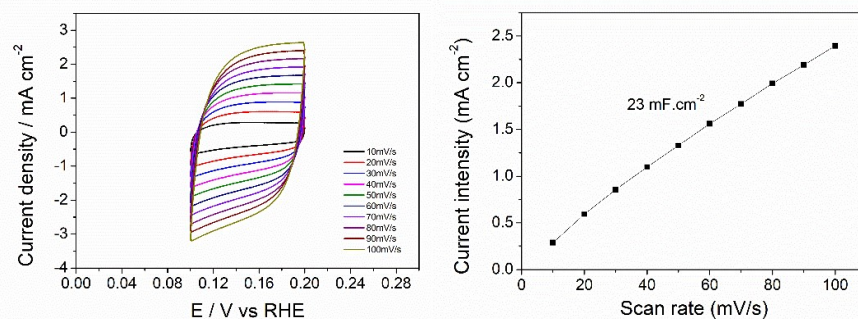

**Fig. S10** CV curves of Ru@N/S/TiO<sub>2</sub>/rGO at various scan rates in 1 M KOH, charging current density differences plotted against scan rates. The linear slope, equivalent to twice the double-layer capacitance, C<sub>dl</sub> was used to represent the rECSA.

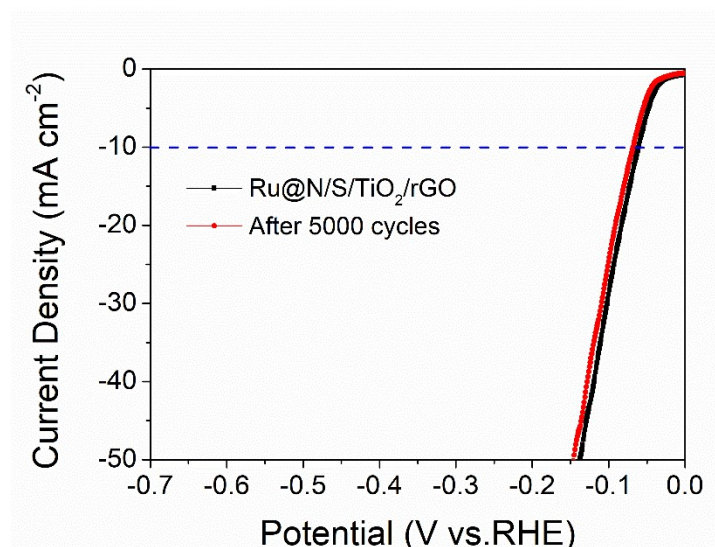

**Fig. S11** LSVs of Ru@N/S/TiO<sub>2</sub>/rGO catalysts before and after 5000 cycles in 0.5 M H<sub>2</sub>SO<sub>4</sub>.

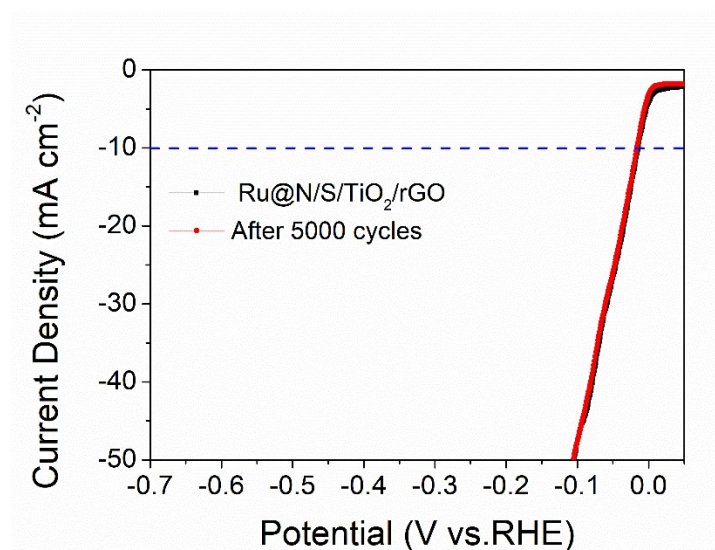

**Fig. S12** LSVs of Ru@N/S/TiO<sub>2</sub>/rGO catalysts before and after 5000 cycles in 1 M KOH.

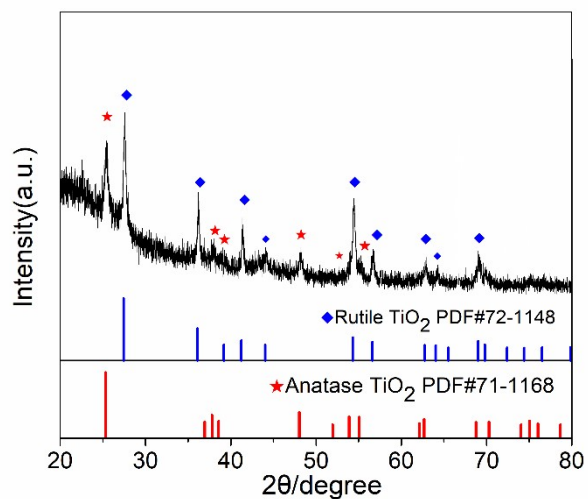

**Fig. S13** XRD of Ru@N/S/TiO<sub>2</sub>/rGO catalysts after 5000 cycles CV.

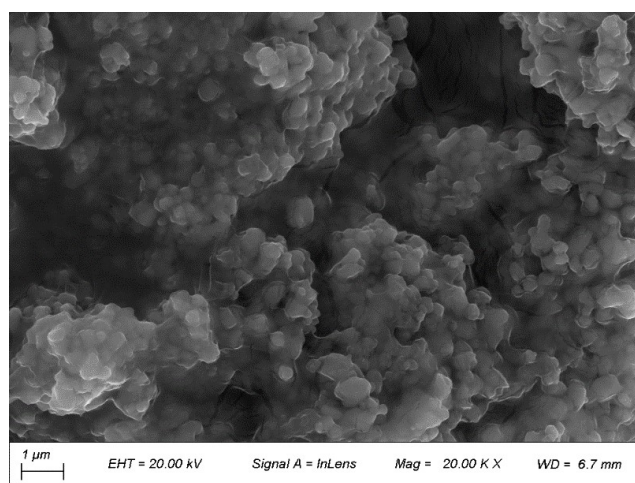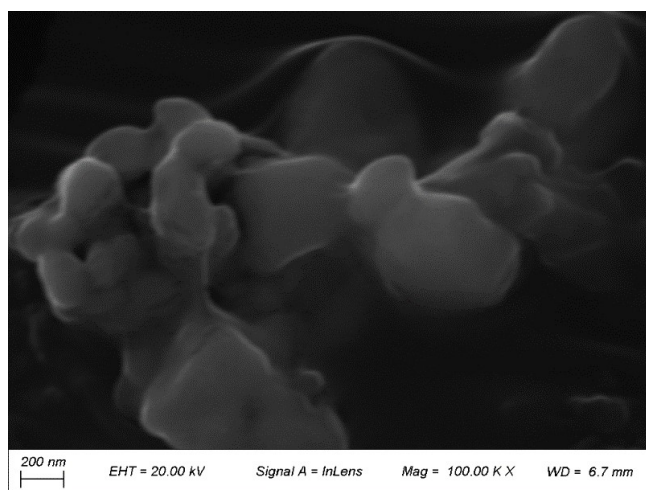

**Fig. S14** SEM of Ru@N/S/TiO<sub>2</sub>/rGO catalysts after 5000 cycles CV.



EDS 分层图像 6

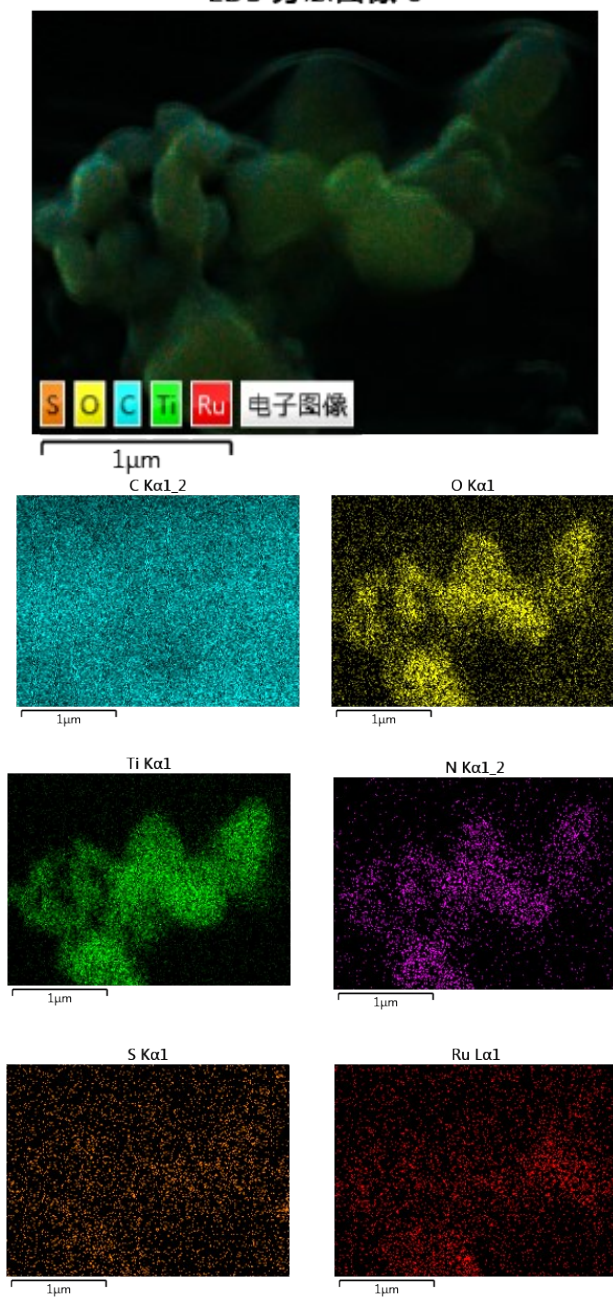

**Fig. S15** EDS mapping of Ru@N/S/TiO<sub>2</sub>/rGO catalysts after 5000 cycles CV.

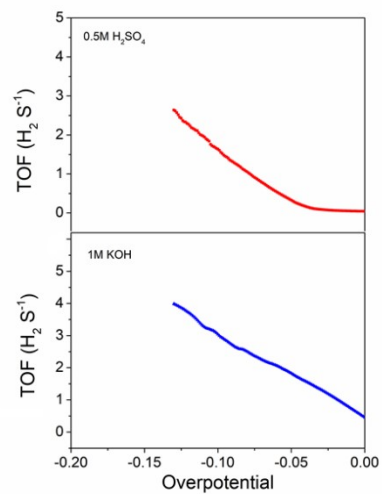

**Fig. S16** TOF of Ru@N/S/TiO<sub>2</sub>/rGO catalysts in 0.5M H<sub>2</sub>SO<sub>4</sub> and 1M KOH.

**Table S1.** Summary of HER catalytic activities of Ru@N/S/TiO<sub>2</sub>/rGO and some other catalysts reported in recent literatures (the potential is obtained at a current density of 10 mA cm<sup>-2</sup> for HER in 0.5 M H<sub>2</sub>SO<sub>4</sub>).

| Catalysts                                                        | HER Overpotential @10 mA cm <sup>-2</sup> (mV) | Tafel Slope (mV dec <sup>-1</sup> ) | Ref.                                             |
|------------------------------------------------------------------|------------------------------------------------|-------------------------------------|--------------------------------------------------|
| Ru@N/S/TiO <sub>2</sub> /rGO                                     | 60                                             | 51                                  | In this work                                     |
| CoSAs/PTF-600                                                    | 94                                             | 50                                  | J. Mater. Chem., A, 2019, 7, 1252.               |
| MWCNTs                                                           | 17                                             | 27                                  | Nat. Commun., 2020, 11, 1278.                    |
| MoS <sub>2</sub> -60 s                                           | 131                                            | 48                                  | J. Am. Chem. Soc., 2020, 142, 4298.              |
| L-Ag                                                             | 136                                            | 71                                  | Nature Catalysis, 2020, 2, 1107.                 |
| Ru@GnP                                                           | 13                                             | 30                                  | Adv. Mater., 2018, 1803676                       |
| NPNi-MoS <sub>2</sub> /RGO                                       | /                                              | 71                                  | ACS Catal., 2018, 8, 8107.                       |
| C <sub>3</sub> N <sub>4</sub> -Ru                                | 140                                            | 57                                  | J. Mater. Chem. A, 2017, 5, 18261.               |
| Rh-Rh <sub>2</sub> P@C                                           | 24                                             | 36                                  | J. Mater. Chem. A, 2020, 8, 12378.               |
| WC1-X                                                            | 247                                            | /                                   | ACS Appl. Energy Mater., 2020, 3, 1082.          |
| Fe <sub>40</sub> Co <sub>40</sub> P <sub>13</sub> C <sub>7</sub> | 118                                            | 46                                  | ACS Appl. Mater. Interfaces, 2017, 9, 37, 31340. |
| IrO <sub>2</sub> -CoPi-CNT                                       | 29                                             | 27                                  | J. Mater. Chem. A, 2020, 8, 8273.                |
| B12/G800A                                                        | 115                                            | 65                                  | J. Mater. Chem. A, 2019, 7, 7179.                |
| FePc-MoS <sub>2</sub>                                            | 123                                            | 32                                  | Nanoscale, 2019, 11, 14266.                      |
| CoSAs/PTF-600                                                    | 94                                             | 50                                  | J. Mater. Chem. A, 2019, 7, 1252.                |
| Co:WS <sub>2</sub>                                               | 240                                            | 49                                  | Energy Environ. Sci., 2018, 11, 2270.            |
| D-TiO <sub>2</sub> /Co@NCT                                       | 167                                            | 73                                  | Nano Res., 2017, 10, 2599.                       |
| RuP <sub>2</sub> @NPC                                            | 38                                             | 38                                  | Angew. Chem. Int. Ed., 2017, 56, 11559.          |

**Table S2.** Summary of HER catalytic activities of Ru@N/S/TiO<sub>2</sub>/rGO and some other catalysts reported in recent literatures (the potential is obtained at a current density of 10 mA cm<sup>-2</sup> for HER in 1 M KOH).

| Catalysts                                           | HER Overpotential @10 mA cm <sup>-2</sup> (mV) | Tafel Slope (mV dec <sup>-1</sup> ) | Ref.                                       |
|-----------------------------------------------------|------------------------------------------------|-------------------------------------|--------------------------------------------|
| Ru@N/S/TiO <sub>2</sub> /rGO                        | 5                                              | 45                                  | In this work                               |
| MWCNTs                                              | 16                                             | 27                                  | Nat. Commun., 2020, 11, 1278.              |
| Ru@GnP                                              | 22                                             | 28                                  | Adv.Mater., 2018, 1803676.                 |
| Co <sub>3</sub> S <sub>4</sub> @FNC-Co <sub>3</sub> | 140                                            | 103                                 | Carbon, 2020, 160, 133.                    |
| MoS <sub>2</sub> /NiS                               | 244                                            | 97                                  | Small, 2019, 15, 1803639.                  |
| MoS <sub>2</sub> /Ni <sub>3</sub> S <sub>2</sub>    | 110                                            | 88                                  | Angew. Chem. Int. Ed., 2016, 55, 6702.     |
| Ni <sub>3</sub> FeN/rGO                             | 94                                             | 90                                  | ACS Nano., 2018, 12, 245.                  |
| Ni-Co-P HNBS                                        | 107                                            | 76                                  | Energy Environ. Sci., 2018, 11, 872.       |
| Rh-Rh <sub>2</sub> P@C                              | 37                                             | 32                                  | J. Mater. Chem. A, 2020, 8, 12378.         |
| WC1-X                                               | 216                                            |                                     | ACS Appl. Energy Mater., 2020, 3, 1082.    |
| c-Ni@a-Ni(OH) <sub>2</sub>                          | 57                                             | 45                                  | J. Mater. Chem. A, 2020, 8, 23323.         |
| P-rich IrP <sub>2</sub> @NC                         | 28                                             | /                                   | Energy Environ. Sci., 2019, 12, 952.       |
| RuP <sub>2</sub> @NPC                               | 52                                             | 69                                  | Angew. Chem. Int. Ed., 2017, 56, 11559.    |
| CoP/CC                                              | 209                                            | 129                                 | J. Am. Chem. Soc., 2014, 136, 7587.        |
| WP NAs/CC                                           | 150                                            | 102                                 | ACS Appl Mater Interfaces, 2014, 6, 21874. |
| MoP NA/CC                                           | 80                                             | 83                                  | Appl. Catal. B: Environ., 2016, 196, 193.  |
| MoP <sub>2</sub> NPs/Mo                             | 194                                            | 80                                  | Nanoscale, 2016, 8, 8500.                  |
| Co-NCNT/CC                                          | 180                                            | 193                                 | ChemSusChem, 2015, 8, 1850.                |
